# Supplementary material for: Environmental Determinants of Bicycling Injuries in Alberta, Canada
Source: PubMed Central journal article supplement (PMC3515916; doi:10.1155/2012/487681), 2012-11-28
Supplement: 487681.f1.pdf [file 487681.f1.pdf]

## Appendix A

### Environmental Determinants of Cycling Injuries: Additional environmental audit

Observer: \_\_\_\_\_

Control site

Calgary

Case site

Edmonton

Date: \_\_\_\_ / \_\_\_\_ / \_\_\_\_  
Day Month Year

Location description: \_\_\_\_\_

#### A. Path for walking &/or cycling

36. Path width (cm): \_\_\_\_\_

5a. Intersection:

N/A

Path/path

Path/road

Path/other: \_\_\_\_\_

5b. Kerb cuts:

N/A

Kerb lip height (cm): \_\_\_\_\_

21a. Parking:

N/A

On street parallel parking

On street angle parking

Parking lot (fill out 21)

Other: \_\_\_\_\_

#### Comments:

*Please write the question number, if the comment related to a specific item on the SPACES tool.*

---

---

---

---

---

***To be filled out from the cyclist interview if location is a case site only:***

Type of error (check one only):

Mid-block ride out

Cyclist inattention/error

Driver inattention/error

Other: \_\_\_\_\_
